# Supplementary material for: Dietary excess regulates absorption and surface of gut epithelium through intestinal PPARα
Source: PubMed Central journal article supplement (PMC8639731; doi:10.1038/s41467-021-27133-7), 2021-12-02
Supplement: 41467_2021_27133_MOESM1_ESM.pdf [file 41467_2021_27133_MOESM1_ESM.pdf]

Supplementary Information for

**Dietary excess regulates absorption and surface of gut epithelium through intestinal PPAR $\alpha$**

Ozren Stojanović, Jordi Altirriba, Dorothée Rigo, Martina Spiljar, Emilien Evrard, Benedek Roska, Salvatore Fabbiano, Nicola Zamboni, Pierre Maechler, Françoise Rohner-Jeanrenaud, Mirko Trajkovski\*

\* to whom correspondence should be addressed: [mirko.trajkovski@unige.ch](mailto:mirko.trajkovski@unige.ch)

The PDF files includes:

Supplementary figures

Supplementary legends

Supplementary tables

# Supplementary Figure 1

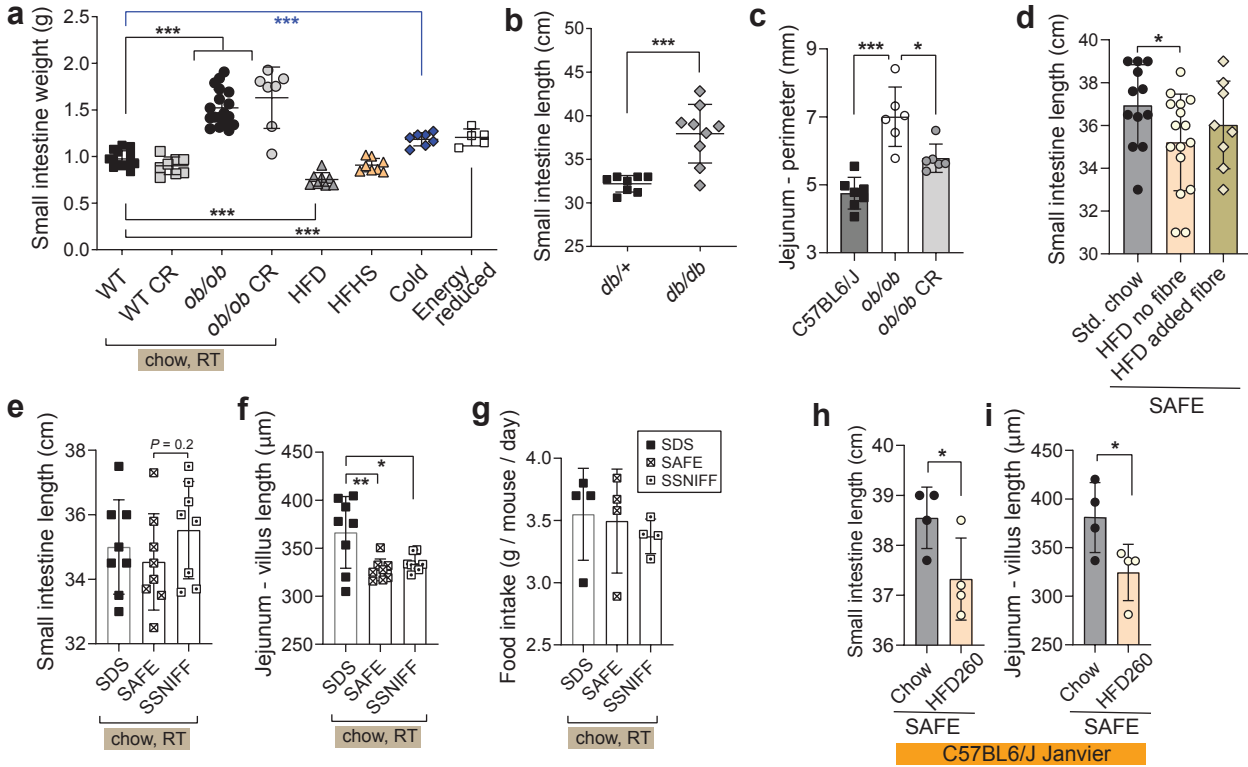

**Supplementary Figure 1. Correlation between diet type, food intake and gut size (related to Figure 1).** **a**, Small intestine weight of male mice 14-week-old, C57BL6 background, SPF facility, n=14 (WT), 8 (WT CR), 17 (*ob/ob*), 7 (*ob/ob* CR), 8 (HFD, HFHS), 7 (Cold), 5 (ER) mice.. Abbreviation of the treatments: CR = caloric restriction (60% of ad libitum) for 6 weeks (WT, *ob/ob* groups), HFD = high-fat diet, HF-HS = high-fat high-sucrose diet, RT = room temperature (23°C), Cold = 6°C for 30 days, Energy reduced = *ad libitum* feeding on diet with the low caloric density for 30 days. WT, HFD, HF-HS pooled from two independent experiments. **b**, Small intestine length in 14-week old *db/+* and *db/db* male mice, n=9 per group. **c**, Jejunum perimeter increase in *ob/ob* mice (n=6), and its decrease in *ob/ob* CR (n=6), compared to C57BL6/J WT (n=7). **d**, Small intestine length in C57BL/6J male mice on standard chow or on HFD with no fibre (SAFE HFD260) or with added fibre content (SAFE HFD150), from SAFE (France) for 6 weeks, n=12 mice per group. **e-g**, Comparison of three chow diets in C57BL6/J mice (Charles River France), RD = RM-3 (Special Diets Service), SAFE = Safe 150, SSNIFF = (ssniff), small intestinal length (**e**), villus length (**f**), food intake (**g**), n=8 per group. **h-i**, Intestinal (**h**) and villus length (**i**) in 12-week old C57BL6/J from Janvier fed Safe 150 chow or Safe HFD260 diet (4-week treatment), n=4 mice per group. All data represent mean  $\pm$  S.D., \*  $P \leq 0.05$ , \*\* $P < 0.01$ , \*\*\* $P < 0.001$  of unpaired two-sided *t*-test, confidence level 95%. Source data are provided as a Source Data file.

## Supplementary Figure 2

*Pck1* deletion, check for compensation by the isoform and the key gluconeogenic genes

### a Vi1CreERT2 x *Pck1* lox/lox

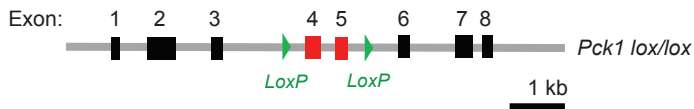

### b Recombination in crypt cells (FACS) (exon 4-5 excision)

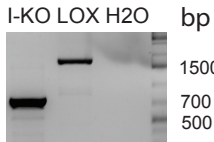

### c *Pck1* over exon 4-5

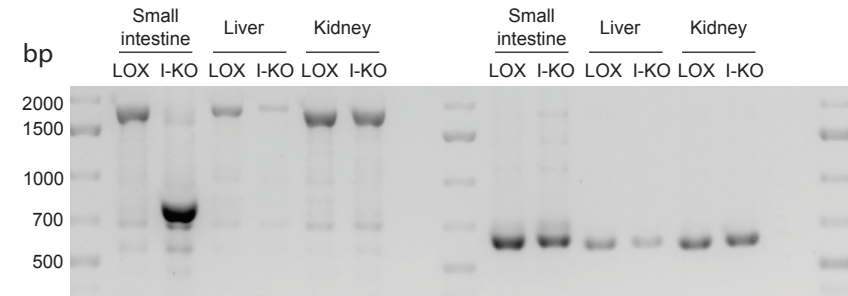

### *Pck1* exon 1

Small intestine Liver Kidney  
LOX I-KO LOX I-KO LOX I-KO

Relative gene expression (*Tbp*)

### d Intestine (whole tissue)

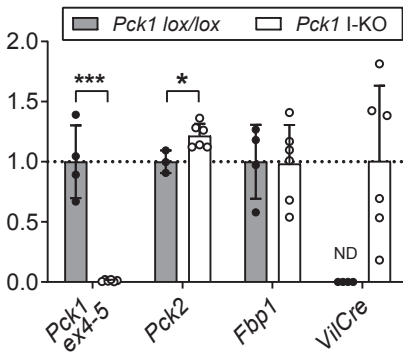

### Kidney

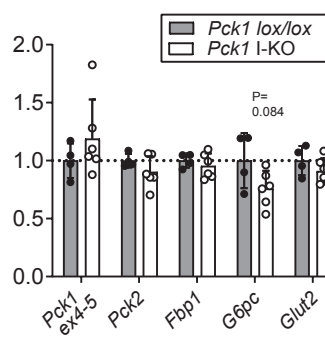

### Liver

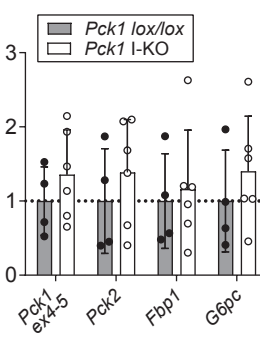

### e

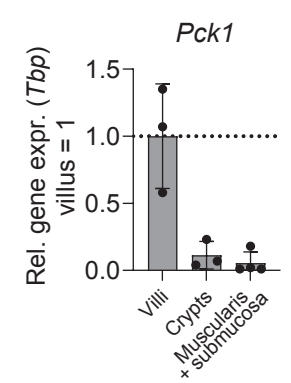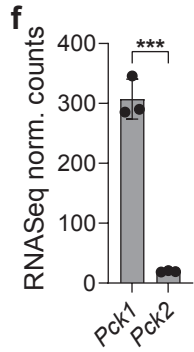

### g

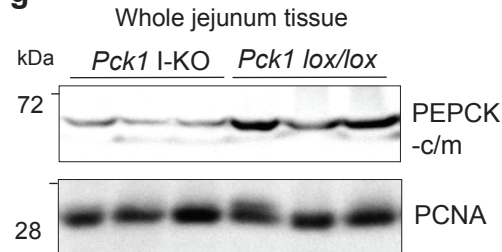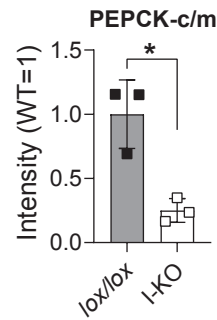



**Supplementary Figure 2. Generation of *VilCreERT2* x *Pck1*<sup>lox/lox</sup> (*Pck1* I-KO) mice. **a**, targeting exon 4-5 of *Pck1* locus<sup>65</sup>. **b**, PCR over exons 4-5 in sorted epithelial cells from the crypts of *Pck1* I-KO mice injected with tamoxifen. **c**, Agarose gel of PCR over exon 4-5 in small intestine, liver and kidney (*left*), and over exon 1 outside of targeted region (*right*). **d**, Gene expression of *Pck1*, *Pck2* and other gluconeogenic genes by qPCR in jejunum, liver and kidney of *Pck1* I-KO (n=4) and lox/lox mice (n=6), after 30 days of cold exposure. **e**, Expression of *Pck1* in villus, crypt and mucosal-serosal domain of jejunum of WT control mice, normalized to *Tbp* and to the levels in the villus, n=4 per group. **f**, RNA levels by RNA sequencing of PCK isoforms in the jejunum of WT control mice, n=3 per group. **g**, WB of proximal jejunum whole tissue for PEPCK and housekeeping gene PCNA, and PEPCK signal quantification (n=3 samples per group). All data represent mean  $\pm$  S.D., \* P $\leq$ 0.05, \*\*P<0.01, \*\*\*P<0.001 of unpaired two-sided *t*-test confidence level 95%. Source data are provided as a Source Data file.**

# Supplementary Figure 3

Hk2 recombination, check for compensation by isoform and the key glycolytic genes

## a *VilCreERT2 x Hk2 lox/lox*

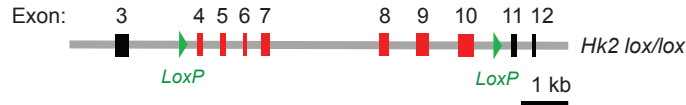

## b Crypt cells (FACS) Tail Liver

bp: Lox I-KO Lox I-KO Lox I-KO

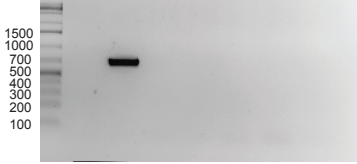

## c Whole jejunum Kidney Liver

bp: I-KO Lox I-KO Lox I-KO Lox

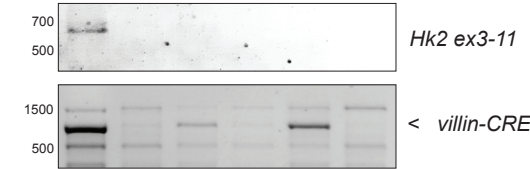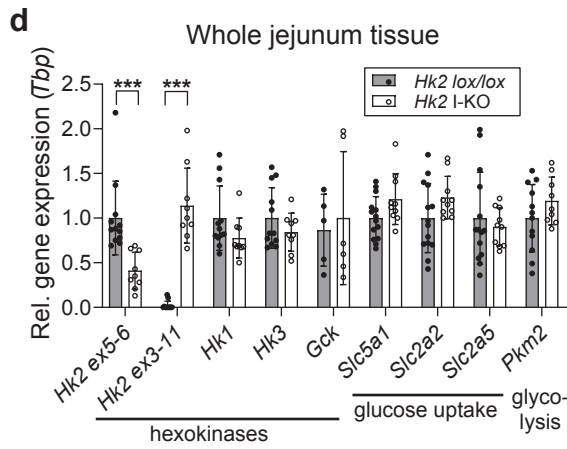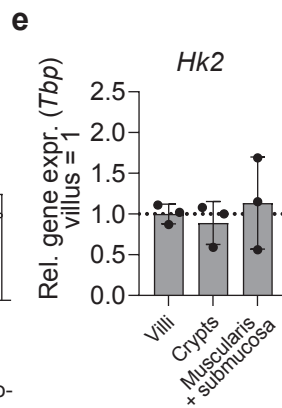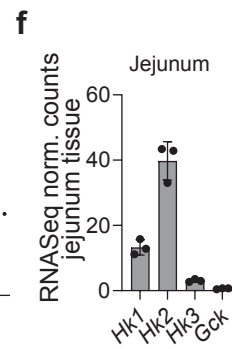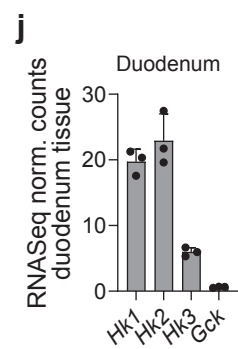

**Supplementary Figure 3. Generation of *VilCreERT2* x *Hk2*<sup>lox/lox</sup> (*Hk2* I-KO) mice. **a**, targeting exons 4-10 in *Hk2* locus (*Hk2*<sup>tm1.1Uku</sup>, MGI:5320615 from European Mutant Mouse Archive). **b**, PCR over exons 4-10 in sorted epithelial cells from the crypts of *Hk2* I-KO mice injected with tamoxifen, detectable only upon recombination. **c**, Agarose gel of PCR over *Hk2* exons 4-10, and of *villin-Cre* amplification in small intestine, liver and kidney. **d**, Gene expression of *Hk2* (excision and recombination), other hexokinase isoforms, glucose uptake and glycolytic genes by qPCR in jejunum of *Hk2* I-KO (n=11) and lox/lox mice (n=10), after 4 months of HFD, two experiments combined. **e**, Expression by qPCR of *Hk2* in villus, crypt and mucosal-serosal domain of jejunum of WT control mice, normalized to *Tbp* and to the levels in the villus, n=4 per group. Note significant expression in non-epithelial fraction, as opposed to other knock-out genes in the study. **f-j**, RNA levels by RNA sequencing of hexokinase isoforms in the jejunum (**f**) and duodenum (**j**) of WT control mice, n=3 per group. All data represent mean ± S.D., \* P≤0.05, \*\*P<0.01, \*\*\*P<0.001 of unpaired two-sided *t*-test, confidence level 95%. Source data are provided as a Source Data file.**

# Supplementary Figure 4

*Glud1* deletion, check for compensations

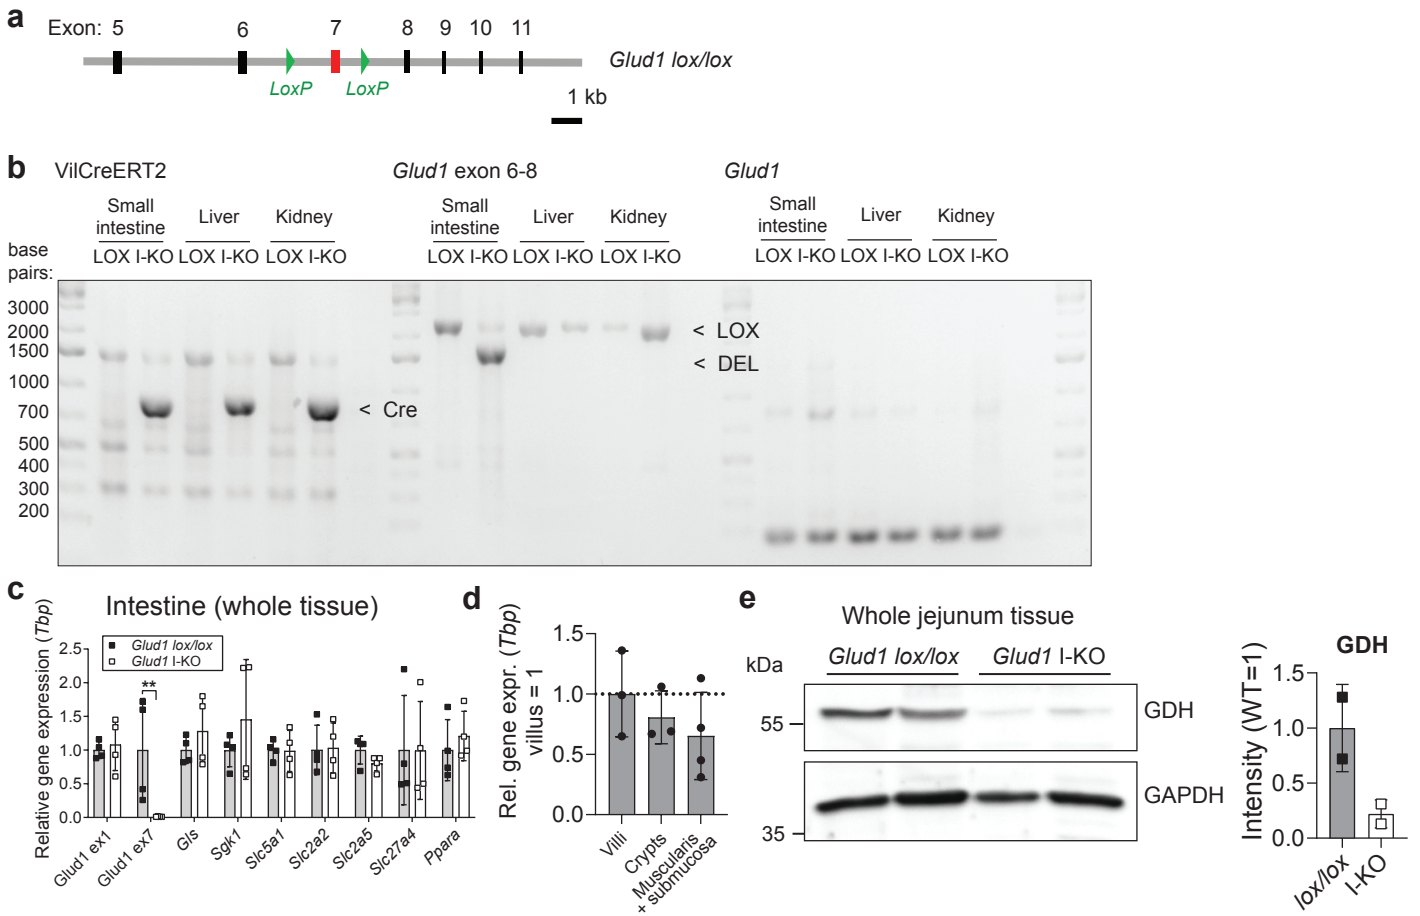

**Supplementary Figure 4. Generation of *VilCreERT2 x Glud1<sup>lox/lox</sup>* (*Glud1* I-KO) mice.**

**a**, Targeting exon 7 on *Glud1* locus. **b**, PCR of *villin Cre*, *Glud1* over excised exon 7 and non-excised part in small intestine, liver and kidney. **c**, Gene expression of *Glud1* (non-excised and excised part), glutaminase, the genes of carbohydrate uptake, and of *Ppara*, by qPCR in jejunum of *Glud1 lox/lox* and I-KO and mice, after 4 months of HFD, from one experiment (n=4 per group). **d**, Expression by qPCR of *Glud1* in villus, crypt and mucosal-serosal domain of jejunum of WT control mice, normalized to *Tbp* and to the levels in the villus, n=4 per group. **e**, WB of proximal jejunum whole tissue for glutamate dehydrogenase (GDH) and housekeeping protein GAPDH, and GDH signal quantification (n=2 per group). All data represent mean  $\pm$  S.D., \*  $P \leq 0.05$ , \*\* $P < 0.01$ , \*\*\* $P < 0.001$  of unpaired two-sided *t*-test, confidence level 95%. Source data are provided as a Source Data file.

# Supplementary Figure 5

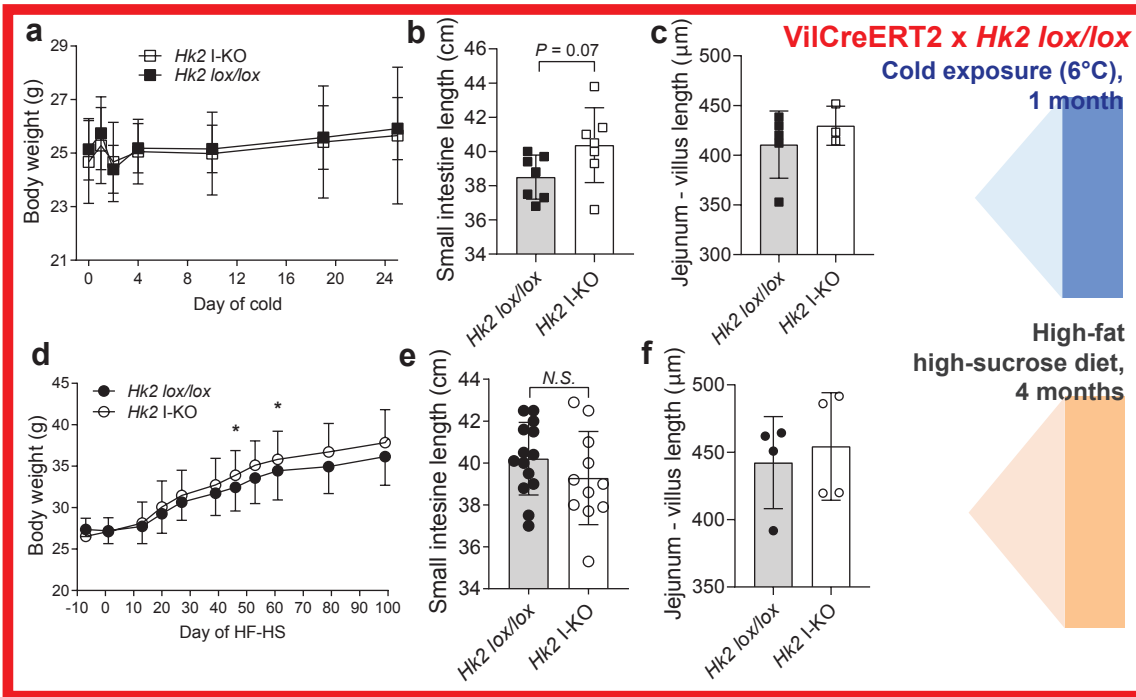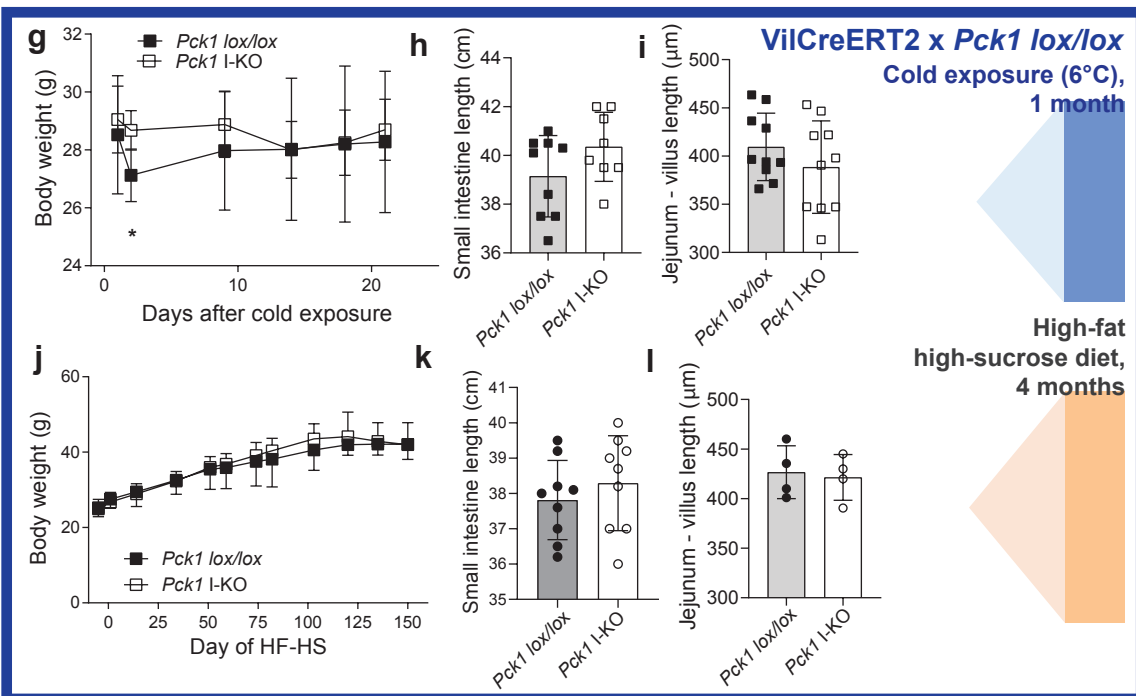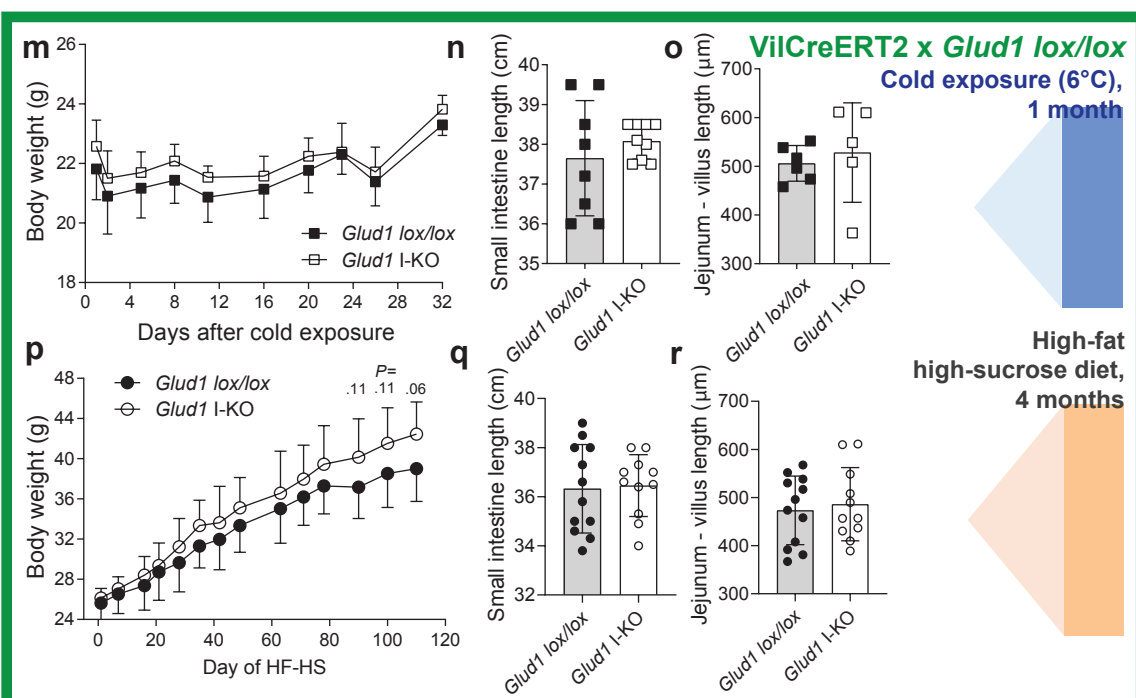

**Supplementary Figure 5. Intestinal deletion of rate-limiting enzymes for glycolysis, gluconeogenesis and glutamate dehydrogenase does not impair intestinal adaptive expansion on cold, and does not reduce BW gain on high-fat high-sucrose diet (HF-HS).** The treatments started at age 8-9 weeks, one week after tamoxifen induction and lasted as indicated. All mice were male, and SPF housed. Body weight, small intestinal length and average villi length in jejunum shown for every experiment, left to right. **a-f**, *VilCreERT2 x Hk2* male mice on cold and HF-HS, n=7 per group (**a, b**), n=4 (lox/lox) and 3 (I-KO) mice per group (**c**), n=11 per group (**d, e**), n=4 per group (**f**). **g-l**, *VilCreERT2 x Pck1* male mice on cold and HF-HS, n=9 (lox/lox) and 8 (I-KO) mice per group (**g-h**), n=10 per group (**i**), n=9 per group (**j-k**) and n=4 per group (**l**). **m-r**, *VilCreERT2 x Glud1* male mice on cold and HF-HS, n=8 (lox/lox), 9 (I-KO) mice (**m-n**), n=6 (lox/lox), 5 (I-KO) mice (**o**), n=12 (lox/lox), 11 (I-KO) mice (**p-r**). The graphs are pools of two independent experiments, except **c, f, l**, and **o**, which are from one experiment. All data represent mean  $\pm$  S.D, \* P $\leq$ 0.05, \*\*P<0.01, \*\*\*P<0.001 of unpaired two-sided *t*-test, confidence level 95%.

# Supplementary Figure 6

Genotyping of *Ppara* I-KO and *Ppara lox/lox* mice, check for isoform compensation

## a *VilCre x Ppara lox/lox*

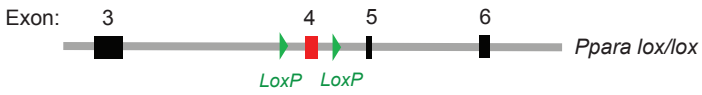

## b

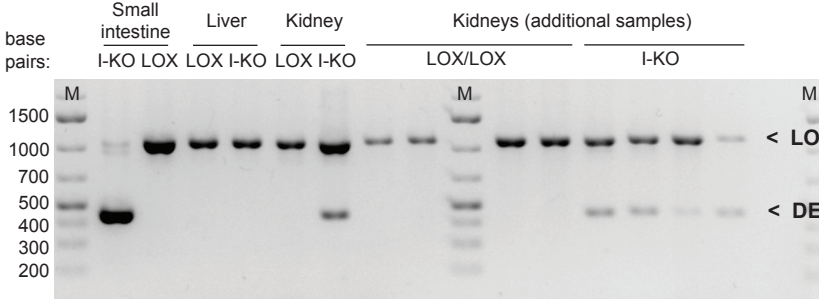

## c

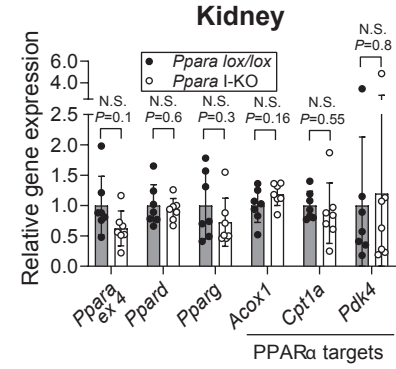

**Intestine qPCR:**  
Figure 2l  
Figure 6f

**Liver qPCR:**  
Figure 3j

## d

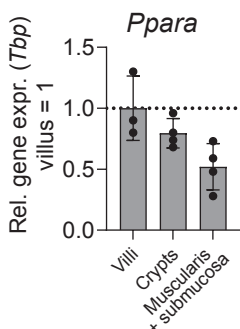

## e

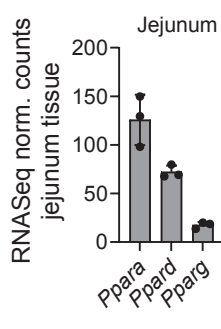

## f

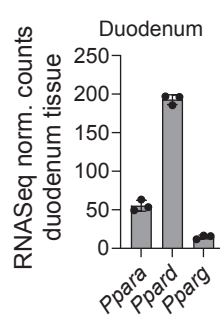

## g

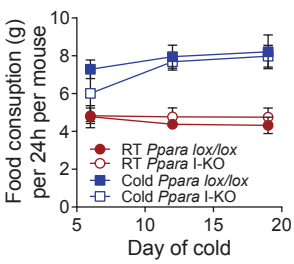

## h

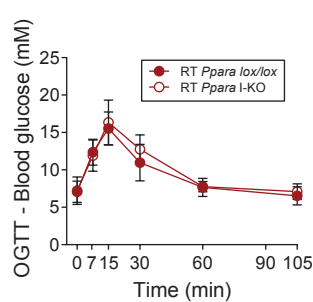

## i

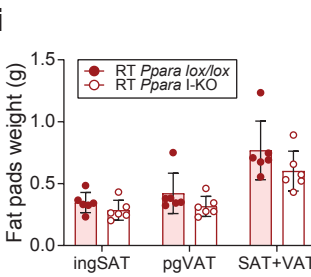

## j

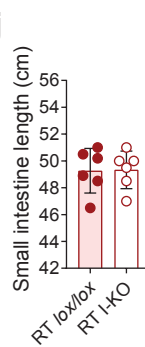

## k

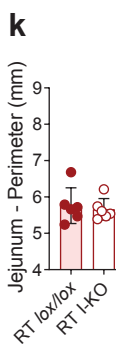

## l

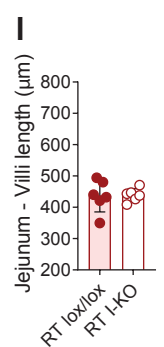



**Supplementary Figure 6. Generation of *Ppara* I-KO mice.** **a**, Targeting exon 4 of *Ppara* gene. **b**, Agarose gel of the PCR amplification over exon 4, recombination in intestine, and partial leakage in kidney. **c**, expression of PPAR genes by qPCR in kidneys of *Ppara* I-KO and *lox/lox* mice, n=7 per group. **d**, Expression by qPCR of *Ppara* in villus, crypt and serosal domain of jejunum of WT control mice, normalized to *Tbp* and to the levels in the villus, n=4 per group. **e-f**, RNA levels by RNA sequencing of PPAR isoforms in the jejunum (**e**) and duodenum (**f**) of WT control mice, n=3 per group. **g-l**, Daily food consumption (**g**), oral glucose tolerance test (**h**), fat pad weights (ingSAT = inguinal subcutaneous, pgVAT = perigonadal visceral adipose tissue) (**i**), small intestine length (**j**), average villi length in proximal jejunum (**k**) and perimeter of proximal jejunum (**l**) in the room temperature (RT) *Ppara lox/lox* and *Ppara* I-KO male mice, 16 week-old, n=6 per group, RT controls for the cold-exposed mice in the main Fig. 2f-j. All data represent mean  $\pm$  S.D, \* P $\leq$ 0.05, \*\*P $<$ 0.01, \*\*\*P $<$ 0.001 of unpaired two-sided *t*-test, confidence level 95%. Source data are provided as a Source Data file.

# Supplementary Figure 7

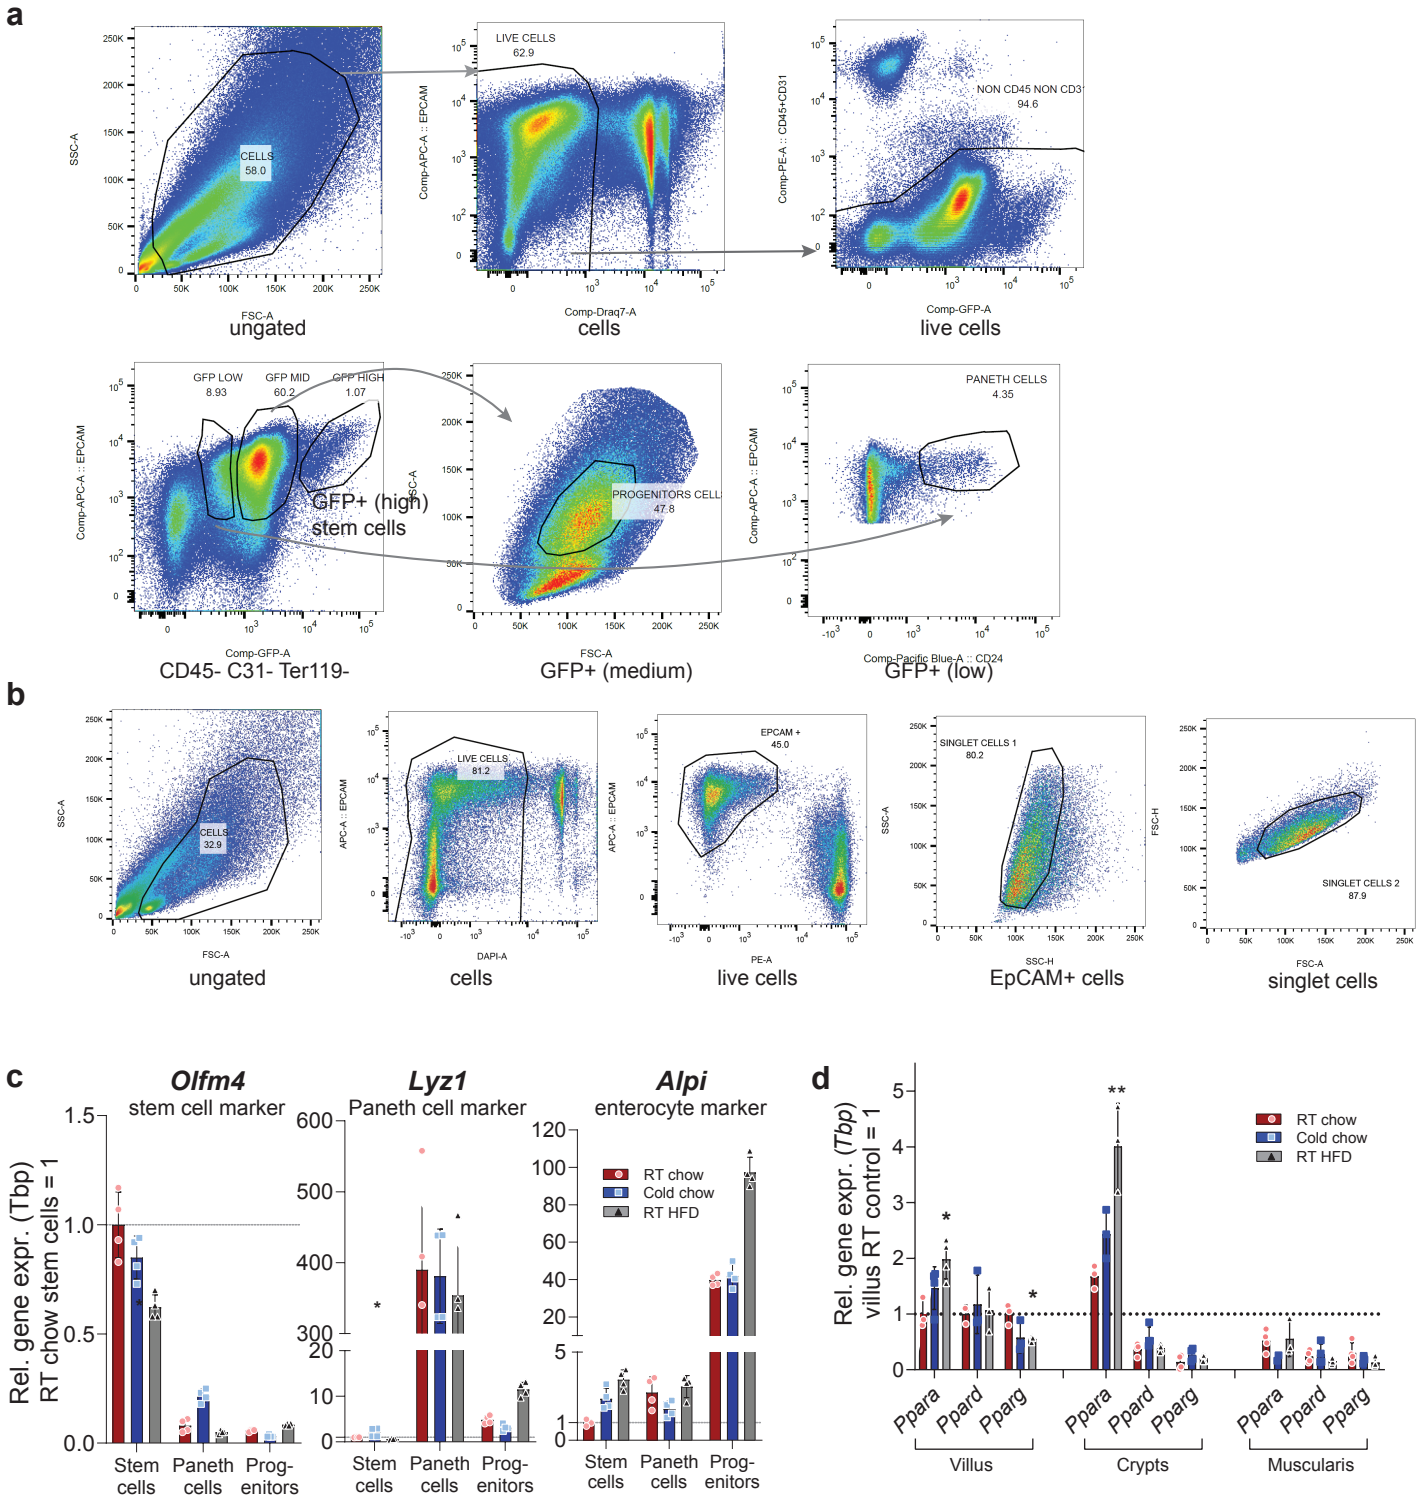

**Supplementary Figure 7. Sorting of epithelial cells from Lgr5-GFP mice exposed two weeks to cold (6°C) or HFD (related to Figure 2n).** **a**, Gating strategy for FACS of the crypt cells into stem, Paneth, and transient progenitor population. Blood cells marked by CD45, CD31 and TER119 were excluded, stem cells were selected according to strong GFP signal, Paneth cells were marked by high CD24 and low GFP signal, and progenitor cells by low CD24, low GFP, and EpCAM+. **b**, FACS of epithelial cells from villus domain (EpCAM+, all subtypes). **c**, Purity and specificity of FACS was controlled by qPCR of marker genes for the sorted types, n=4 per group (2 replicate isolation from 2 mice). **d**, Villus, crypt and mucosal-serosal fraction of jejunum were separated, RNA isolated, and gene expression analysed by qPCR, normalization to *Tbp* and villus level, n=4 mice per group. All data represent mean  $\pm$  S.D, \*  $P \leq 0.05$ , \*\* $P < 0.01$ , \*\*\* $P < 0.001$  of unpaired two-sided *t*-test, confidence level 95%. Source data are provided as a Source Data file.

# Supplementary Figure 8

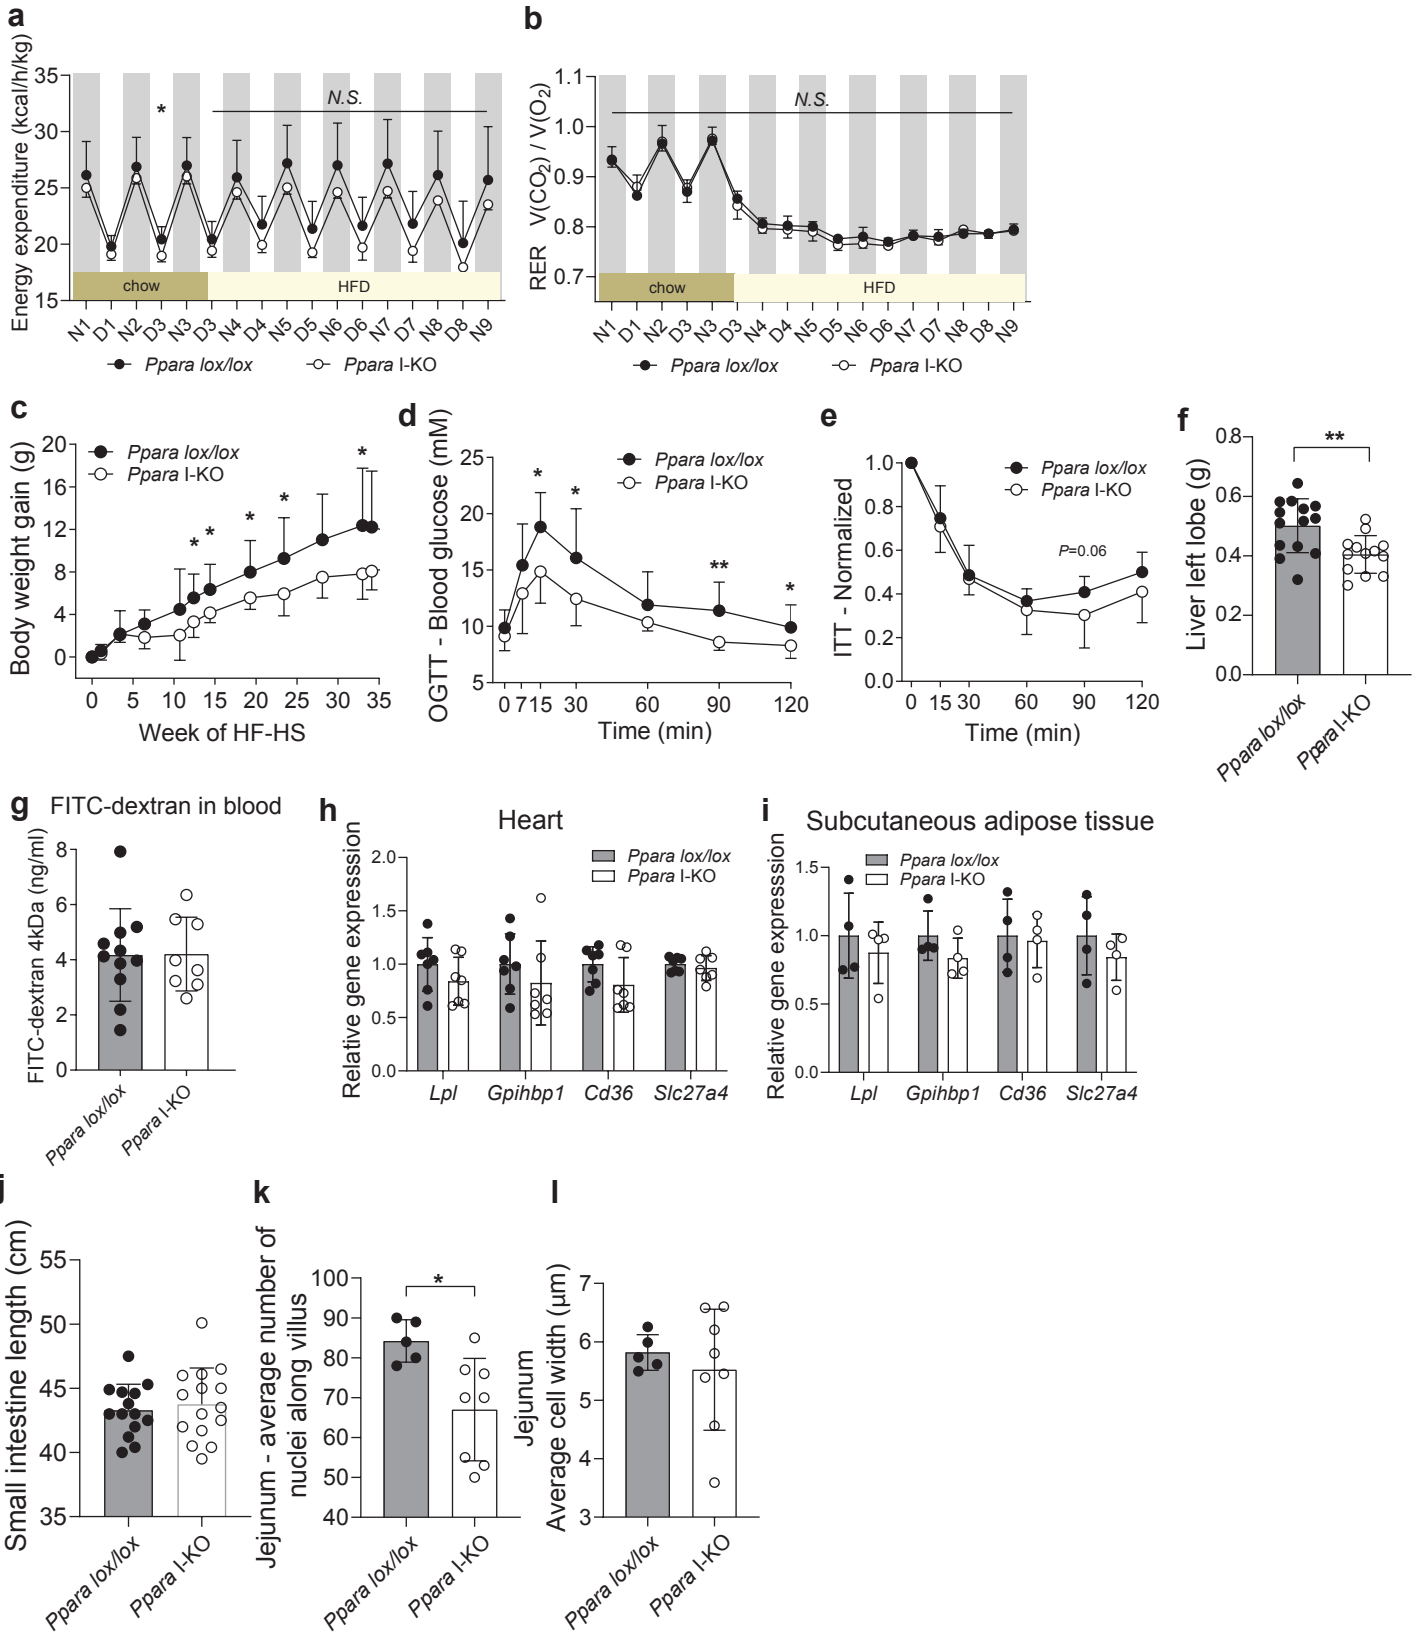

**Supplementary Figure 8. *Ppara* I-KO reduces weight gain and improves oral glucose tolerance during HFD and HF-HS diet.** **a-b**, Energy expenditure normalized to lean mass (**a**) and respiratory quotient  $V(\text{CO}_2) / V(\text{O}_2)$  (**b**), measured in the metabolic cage, of *Ppara lox/lox* and I-KO mice on HFD, n=5 per group. Shaded periods are 12h dark phases. **c-e**, Body weight gain (**c**), OGTT (**d**) and ITT (**e**) in 6h fasted mice of mice on HF-HS diet (from the age of 8 weeks), n=7 for *Ppara lox/lox*, n=9 for *Ppara* I-KO. **f**, Liver left lobe weight of HFD mice, n=14 per group, pooled from two experiments. **g**, Concentration of FITC-dextran 4kDa in plasma, 4 hours after oral gavage, in *Ppara lox/lox* and *Ppara* I-KO mice on HF-HS diet (*Ppara lox/lox* n=11, *Ppara* I-KO n=8). **h-i**, Relative qPCR gene expression normalized to *Tbp* in heart (**h**) and inguinal SAT (**i**) in 6h fasted HFD mice, n=8 per group. **j**, Small intestine length on HFD, n=12 per group. **k-l**, Average number of nuclei (counted on H&E sections) along one side of villus in jejunum (**k**) and average epithelial cell width along the villus (**l**), on HFD, from n=5 (*lox/lox*), 8 (I-KO) mice per group. All data represent mean  $\pm$  S.D., \*  $P \leq 0.05$ , \*\* $P < 0.01$ , \*\*\* $P < 0.001$  of unpaired two-sided *t*-test, \*  $P \leq 0.05$ , \*\* $P < 0.01$ , \*\*\* $P < 0.001$  of *t*-test. Source data are provided as a Source Data file.

# Supplementary Figure 9

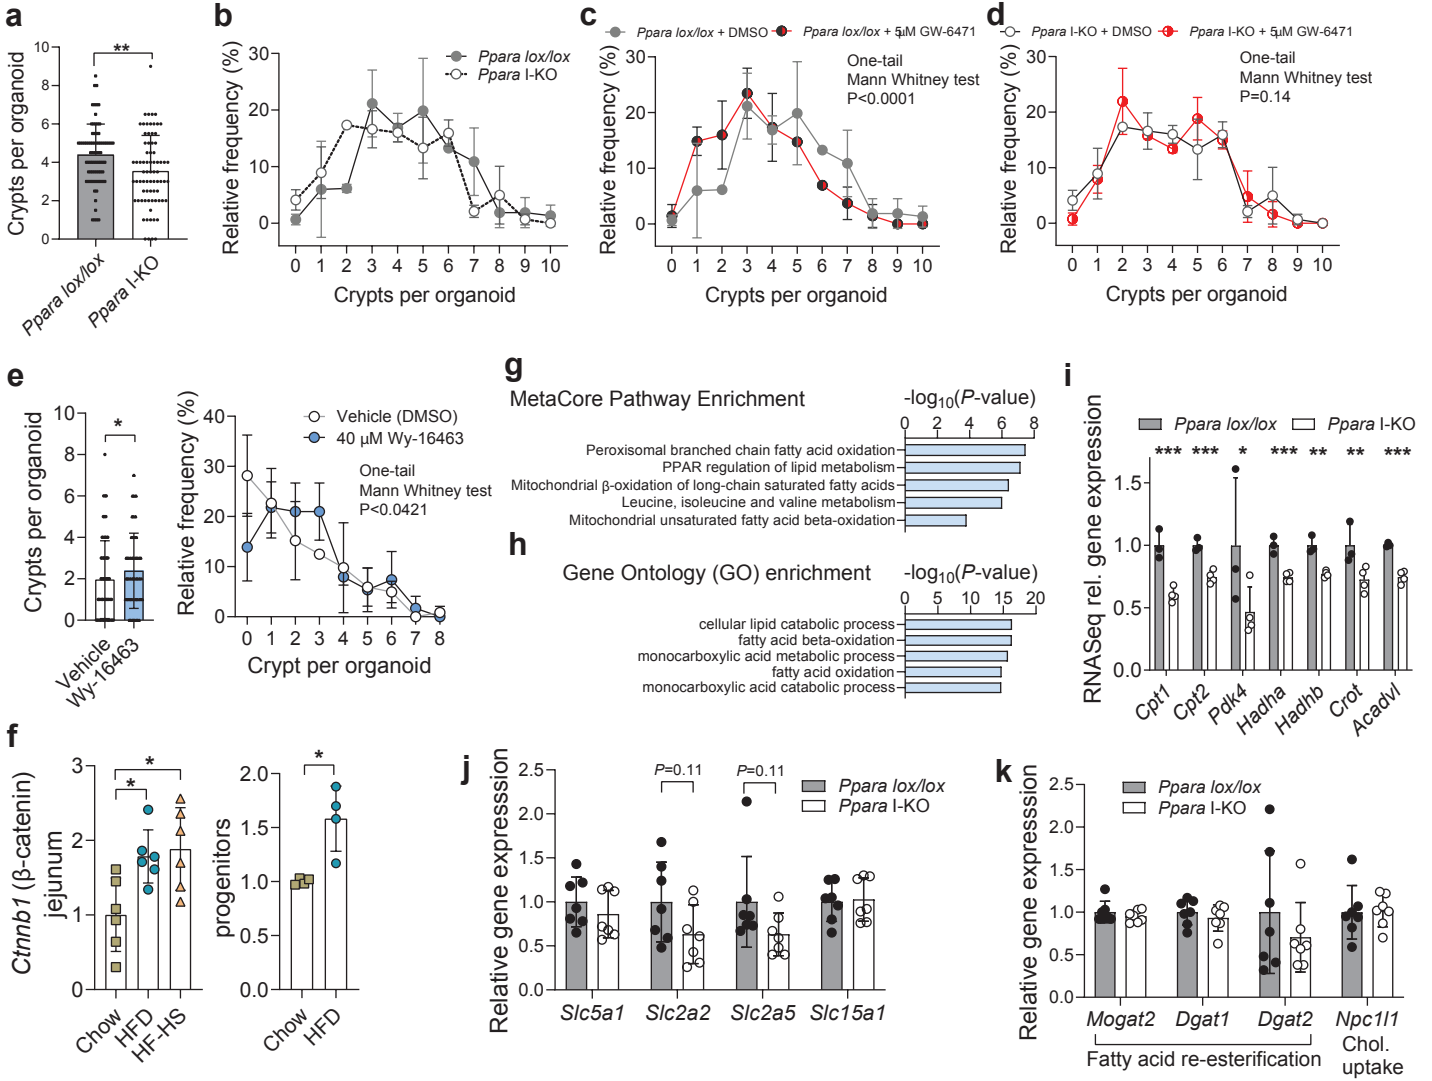

**Supplementary Figure 9. Supplemental characterisation of the *Ppara* I-KO intestines and crypts.** **a-b**, Number of crypts per organoid (**a**) and histogram of the organoids (**b**), derived from two *Ppara lox/lox* and I-KO mice on HFD for 2 months, cultured without inhibitors, counted on day 7. N=53 (*lox/lox*) and 75 (I-KO) organoids (**a**) analysed in N=2 experiments (**b**). **c-d**, Histogram of *Ppara lox/lox* (**c**) and *Ppara* I-KO organoids (**d**), from HFD mice, with and without PPAR $\alpha$  inhibitor, counted at day 7. **a-d** are pooled from n=2 mice per group. **e**, Histogram of WT organoids from HFD mouse, treated daily with PPAR $\alpha$  agonist Wy-16463, n=3 wells per group. Mann-Whitney tests on the histograms refer to comparison of all organoids between the two groups. **f**,  $\beta$ -catenin mRNA levels (qPCR, normalized to *Tbp*) in proximal jejunum (left, n=6 per group) or sorted progenitors from jejunum (right, n=4 per group) of WT mice fed chow or HFD diets. **g-i**, MetaCore pathway enrichment analysis (**g**), GO term enrichment (**h**), and relative expression of the key fatty acid oxidation genes (**i**) analysed from RNA sequencing of whole tissue duodenum of *Ppara lox/lox* (n=3 mice) and *Ppara* I-KO (n=4 mice), following 8-week HFD. **j-k**, Relative qPCR expression of genes for glucose and peptide uptake (**j**) and fatty acid re-esterification (**k**) in jejunum from mice on HFD for 8 weeks, n=7 per group, normalized to *Epcam* (epithelial marker). All data represent mean  $\pm$  S.D, \* P $\leq$ 0.05, \*\*P $<$ 0.01, \*\*\*P $<$ 0.001 of unpaired two-sided *t*-test, confidence level 95%, except for **a** where is for one-tailed Mann-Whitney non-parametric test, and **i** general linear model with negative binomial distribution, without correction for multiple comparison (for RNASeq). Source data are provided as a Source Data file.

# Supplementary Figure 10

## I. Paneth (LyzC+) cells

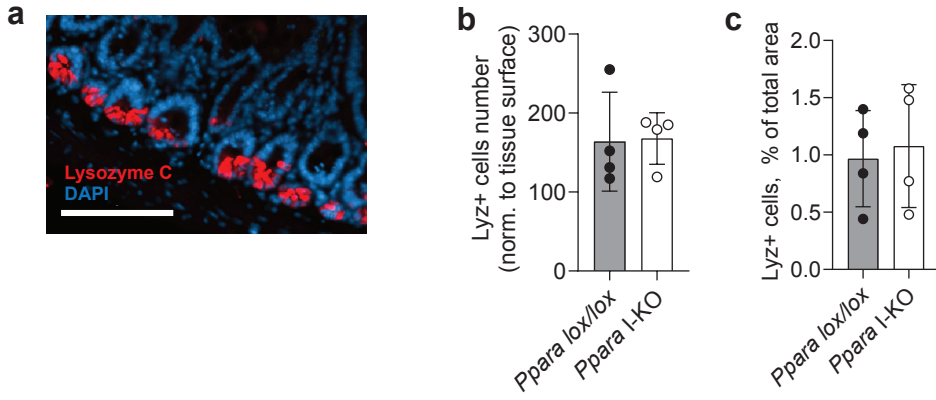

## II. Enteroendocrine (ChgA+) cells

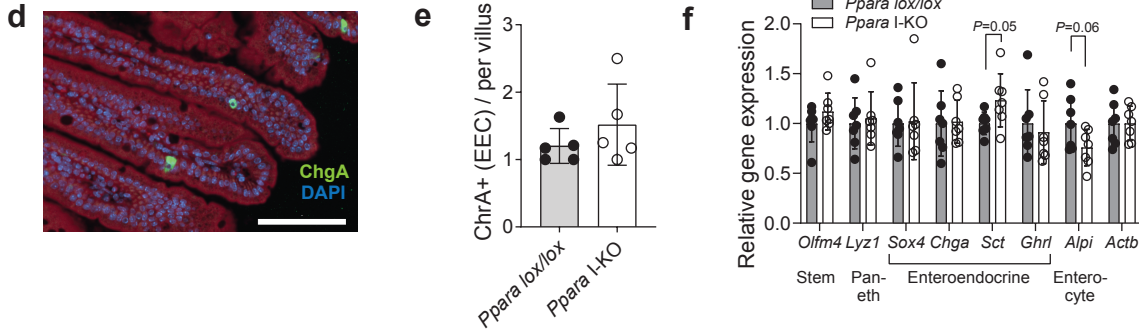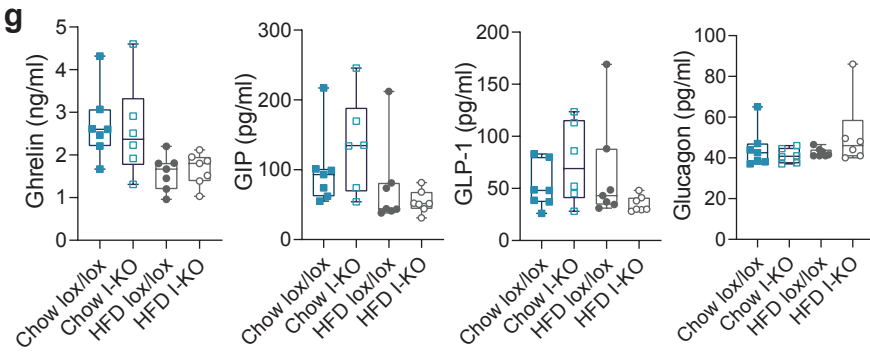

## III. Goblet or mucus cells (Alcian blue)

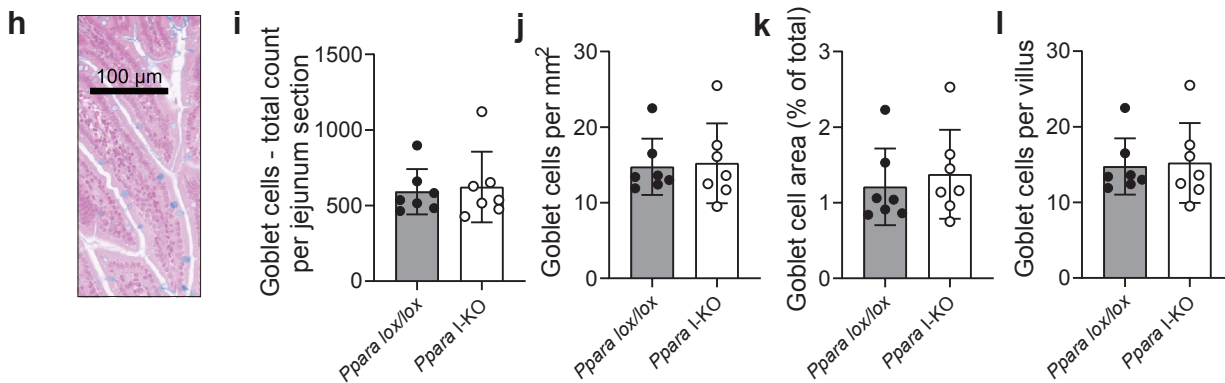

## IV. Mitochondria, apoptosis markers

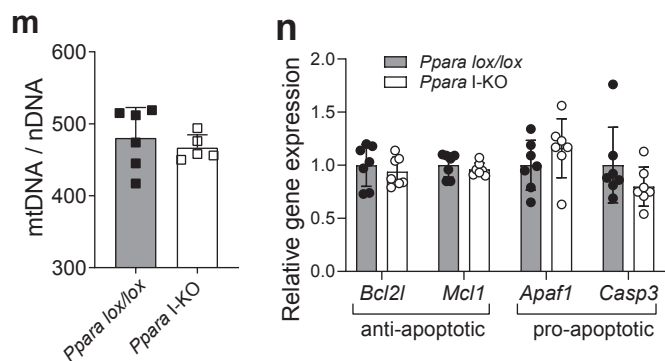



**Supplementary Figure 10. Intestinal cell-type characterization in *Ppara* I-KO jejunua on HFD.** **a-c**, Staining against Paneth cell marker lysozyme C (**a**), number of positive cells normalized to tissue surface (**b**), and their surface area as a percentage of total tissue area (**c**), n=5 per group. **d-e**, Staining against endocrine marker chromogranin A (**d**), average number of ChgA+ cells per villus, quantified in proximal jejunua of n=5 (*lox/lox*) and 4 (I-KO) mice. (**e**). **f**, Relative qPCR expression of cell markers, including EEC in proximal jejunua following 8-week HFD, n=7 per group, normalized to *Tbp*. **g**, Concentration of major incretins in fasted plasma of mice on standard chow or HFD, n=7 per group (HFD I-KO=6). Box represents 25th to 75th percentile, whiskers min to max, central bar is mean. **h-l**, staining for mucus cells by Alcian blue (**h**), and quantification of number of positive cells per section (**i**), per surface area (**j**), by cell area as a percentage to total tissue area (**k**), and cell number per villus (**l**), n=7 per group. **m**, Mitochondrial content in proximal jejunua of HFD mice measured by qPCR of mitochondrial and nuclear DNA, expressed as a ratio of *mt-Nd1* and *Tbp*, n=5 per group. **n**, Relative qPCR of pro- and anti-apoptotic genes in the same samples as in Supplementary Figure 9j-k. Scale bars represent 100  $\mu$ m. All data represent mean  $\pm$  S.D, \* P $\leq$ 0.05, \*\*P<0.01, \*\*\*P<0.001 of unpaired two-sided *t*-test, confidence level 95%, unless stated otherwise. Source data are provided as a Source Data file.

# Supplementary Figure 11

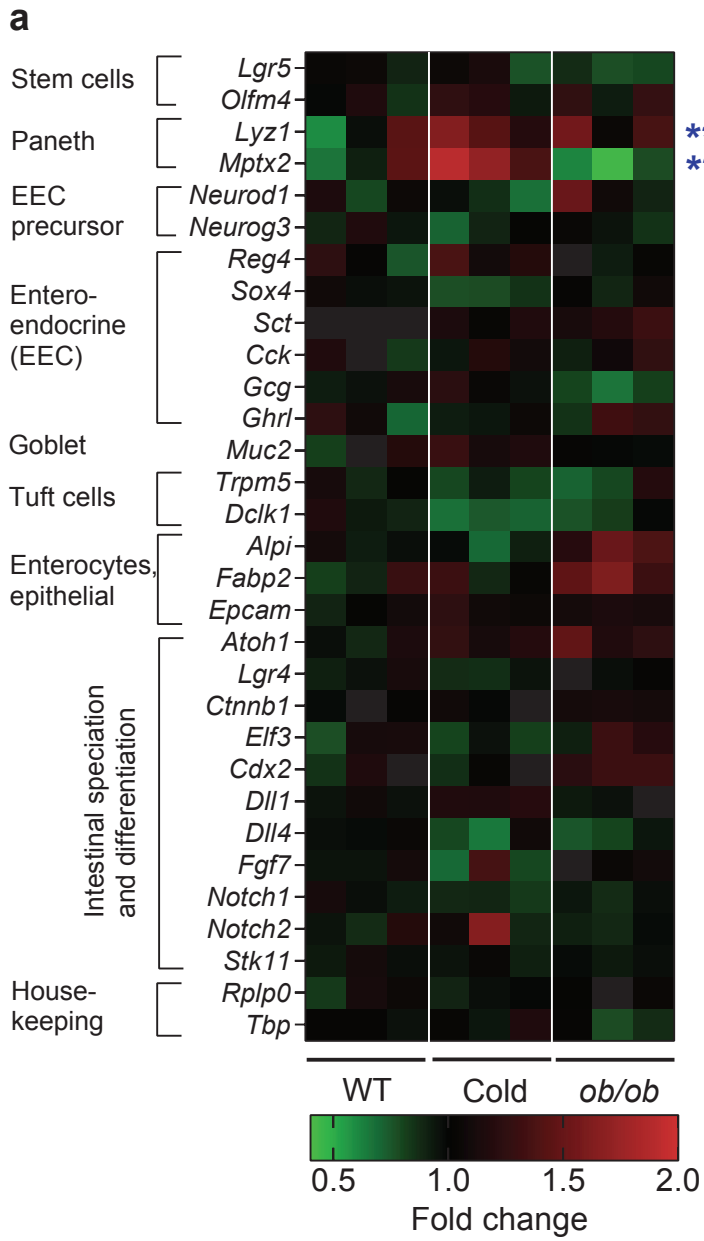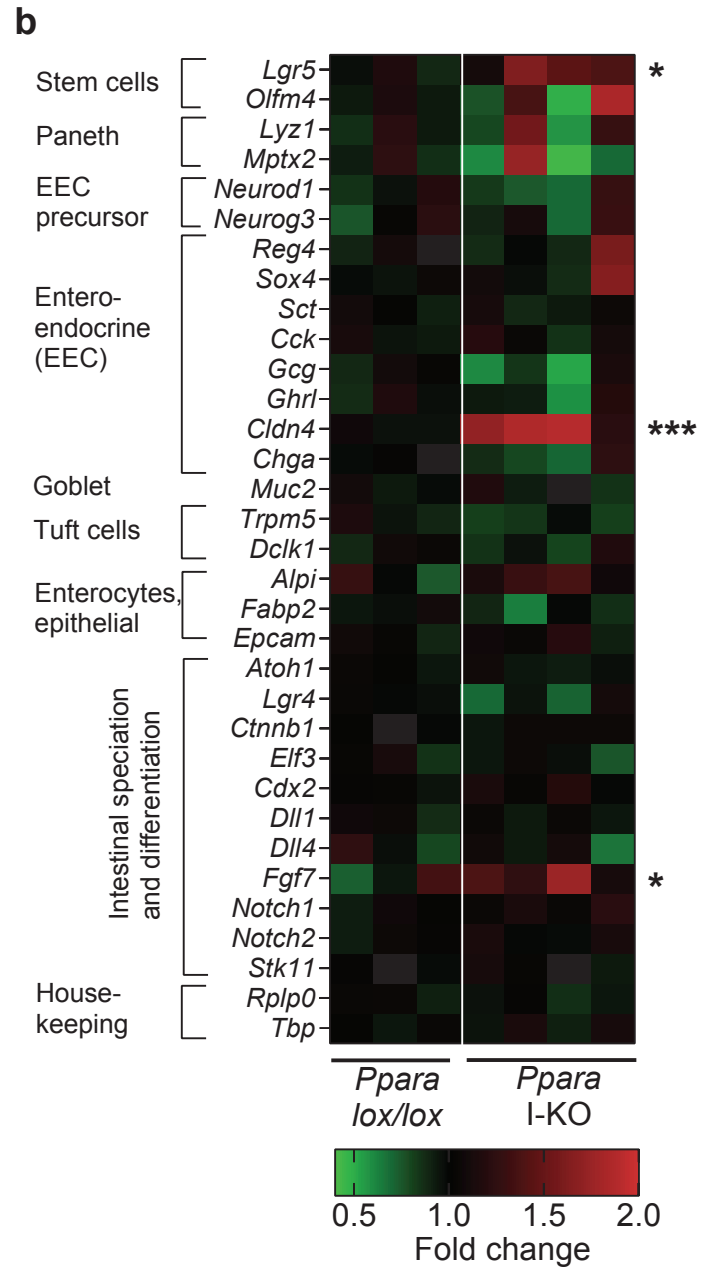

**Supplementary Figure 11. Markers of cell types, intestinal division and differentiation, by RNA sequencing in hyperphagic, and in *Ppara* I-KO mice.** **a**, Gene expression in whole jejunum tissue of WT mice on RT or after 30-day cold-exposure, and in *ob/ob* mice fed ad libitum on RT, from the same dataset as in Figure 2 a, b, d. \* marks significance between WT and Cold, # between WT and *ob/ob*. **b**, Gene expression in whole duodenum tissue of *Ppara lox/lox* and I-KO on HFD, from the same dataset as in Supplementary Figure 9g-i. \* or #  $P \leq 0.05$ , \*\* or ##  $P < 0.01$ , \*\*\* or ###  $P < 0.001$  of general linear model with negative binomial distribution. Source data are provided as a Source Data file.

## Supplementary Table 1. List of primers used in qPCR experiments

### MOUSE

| Gene                   | Forward primer (5' > 3')    | Reverse primer (5' > 3')  |
|------------------------|-----------------------------|---------------------------|
| <i>Acox1</i>           | tccaagccagcgttacgag         | atctccgtctgggctgtagg      |
| <i>Adfp (Plin2)</i>    | cactccactgtccacctgatt       | tcttgagcaccctgaatddd      |
| <i>Apoa4</i>           | cacacagaccaggaaatga         | ccttgatcgtggctctgcat      |
| <i>Cd36</i>            | ttgaaaagtctcggacattgag      | tcagatccgaacacacgcgta     |
| <i>Cpt1a</i>           | gactccgctcgcctcattc         | tctgccatcttgagtgggta      |
| <i>Ctnnb1</i>          | tgcagatcttgactggacat        | aagaacggtagctgggatca      |
| <i>Dgat1</i>           | tttcagcaattatcgtgggtatcc    | aaaaataaccttgcatcactcagga |
| <i>Dgat2</i>           | gctgggtgccctactccaag        | ccagcttggggacagtga        |
| <i>Epcam</i>           | tgtcatttgctccaaactgg        | gttctggatcgccccttc        |
| <i>Fasn</i>            | cctggatagcattccgaacct       | agcacatctcgaaggctacaca    |
| <i>Gk</i>              | tccaggaataataaactttgtcaagtc | caactgcactgaaatcgtgct     |
| <i>Gpihbp1</i>         | gctgcaatcagacacagagc        | gtaggtagtcaggtaacctttgtcg |
| <i>Hmgcs2</i>          | ataccaccaacgcctgttatgg      | caatgtcaccacagaccaccag    |
| <i>Lpl</i>             | tttgtgaaatgccatgacaag       | cagatgctttctctcttggttgt   |
| <i>M6prbp1 (Plin3)</i> | aggaccagctaagccagag         | agggccacacacatgctc        |
| <i>Mogat2</i>          | tacagctttggcctcatgc         | agggctgtgggtgctcatctg     |
| <i>Npc1L1</i>          | ctttgtggccctgctctc          | gcttgaaaagcagcacacg       |
| <i>Pdk4</i>            | cgcttagtgaacactccttcg       | cttctgggctcttctcatgg      |
| <i>Ppara</i>           | agagccccatctgtcctctc        | actggtagtctgcaaaacaaaa    |
| <i>Ppard</i>           | tgcagatgggctgtgatggg        | ctcagagcttcatgcggattgct   |
| <i>Pparg</i>           | aggcgagggcgatcttgacag       | aatcggatggccacctctttg     |
| <i>Plin2</i>           | cactccactgtccacctgatt       | tcttgagcaccctgaatddd      |
| <i>Plin3</i>           | aggaccagctaagccagag         | agggccacacacatgctc        |
| <i>Prdm16</i>          | cagcacgggtgaagccatt         | gcgtgcatccgcttctgtg       |
| <i>Rxra</i>            | acatgcagatggacaagacg        | gggtttgagagccccttaga      |
| <i>Slc15a1</i>         | agacaagctgacaagcataaaca     | catgagctactgtggtgactcc    |
| <i>Slc27a2</i>         | atctagcggaaagcctctgg        | tgccacagccaactcaga        |
| <i>Slc27a4</i>         | cttgccctgagctgcacaa         | gcgggtctttcacacagat       |
| <i>Slc2a2</i>          | gtcagctattcatccacattcagt    | agccaagggtccggtgat        |
| <i>Slc2a5</i>          | agagcaacgatggaggaaaa        | ccagagcaaggaccaatgct      |
| <i>Slc5a1</i>          | ctggcagggccgaagtatg         | ttccaatgttactggcaagag     |
| <i>Tbp</i>             | gaagctgcggtacaattccag       | ccccttgtacccttcaccaat     |

### HUMAN

| Gene                | Forward primer (5' > 3') | Reverse primer (5' > 3') |
|---------------------|--------------------------|--------------------------|
| <i>ACOX1</i>        | gaagtgggtgtagaaccttcca   | cccagggttaagtctggtaga    |
| <i>ADFP (PLIN2)</i> | actggctggtaggtcccttt     | caccttggctcctgagcattc    |
| <i>CD36</i>         | tcccagctcaagtgaatctc     | atgccagttgaatgcctacc     |
| <i>PLIN3</i>        | tgagcttctgagcctcattg     | catttcaacaaggcttaccaca   |
| <i>PK4</i>          | cagaccagttgcgctgatta     | tgttccctctcttctctatatcc  |
| <i>PPARA</i>        | gctgtgtgcacctocctaata    | gtctgaagatgggcttgaatg    |
| <i>SLC15A1</i>      | tgcaggtggaatcgataaa      | aactttaatttggacttctgtttc |
| <i>SLC27A4</i>      | ccgctacctcctgaaccag      | ctagtgccatgcgaacctg      |
| <i>SLC2A2</i>       | ccctgtctgtatccagctttg    | tgtttgctactaacatggctttg  |

## Supplementary Table 2. Mouse food used in the study (based on manufacturers information)

significant differences

### HFD

ssniff, D12492 (E15742-34)  
HF diet for rodents

Source: lard & soybean oil

**Gross Energy** 25.0 MJ/kg  
**Metabolizable Energy** 21.6 MJ/kg

#### Calories

Carbohydrates 20.0  
Protein 20.0  
Fat 60.0

#### Crude Nutrients [%]

Crude protein (N x 6.25) 24.4  
Crude fat 34.6  
Crude fibre 6.0  
Crude ash 5.3  
Starch 0.1  
Sugar 9.4  
N free extracts 26.3

#### Fatty acids [%]

C 12:0 0.07  
C 14:0 0.44  
C 16:0 7.93  
C 18:0 4.37  
C 20:0 0.11  
C 16:1 0.94  
C 18:1 13.97  
C 18:2 4.64  
C 18:3 0.49

#### Dietary composition %

Casein 27.700  
Corn starch  
Maltodextrin 15.600  
Sucrose 8.460  
Cellulose powder 6.000  
L-Cystine 0.350  
Vitamin premix 1.000  
Mineral & trace element premix 6.000  
Choline chloride (50 % choline) 0.250  
Dye (blue) 0.030  
Butylated hydroxytoluene 0.010  
Pork lard 31.500  
Soybean oil 3.100

### HF-HS

ssniff, D12331 (EF D12331 mod)  
Surwit with sucrose

Source: hydrogenated coconut oil

**Gross Energy** 25.1 MJ/kg  
**Metabolizable Energy** 22.6 MJ/kg

#### Calories [%]

Carbohydrates 25.0  
Protein 15.0  
Fat 59.0

#### Crude Nutrients [%]

Crude protein (N x 6.25) 20.2  
Crude fat 35.7  
Crude fibre 0.5  
Crude ash 5.1  
Starch  
Sugar 17.9  
N free extracts 34.1

#### Fatty acids [%]

C 6:0 0.10  
C 8:0 1.97  
C 10:0 1.60  
C 12:0 15.22  
C 14:0 6.54  
C 16:0 3.80  
C 18:0 4.26  
C 20:0 0.06  
C 16:1 0.01  
C 18:1 0.74  
C 18:2 1.23  
C 18:3 0.14

#### Dietary composition %

Casein 23.000  
Corn starch  
Maltodextrin 15.300  
Sucrose 17.000  
Cellulose powder 1.800  
L-Cystine 0.200  
Vitamin premix \* 1.000  
Mineral & trace element premix 5.800  
Choline chloride 0.200  
Dye (yellow & red) 0.100  
Coconut oil, hydrogenated 33.300  
Soybean oil 2.300

\*contains sucrose

**HFD260 (“no fiber”)  
SAFE, HF260 (U8978 Version 19)**

Source: butter-based

**Metabolizable Energy (Atwater) 23.1 MJ/kg**

| <b>Calories</b> | <b>[%]</b> |
|-----------------|------------|
| Carbohydrates   | 26.8       |
| Protein         | 14.4       |
| Fat             | 58.6       |

| <b>Crude Nutrients [%]</b> |      |
|----------------------------|------|
| Crude protein (N x 6.25)   | 20.0 |
| Crude fat                  | 36.0 |
| (All carbohydrates)        | 36.7 |
| Starch                     | 14.5 |
| Sugars                     | 20.2 |
| Sucrose                    | 17.9 |
| Cellulose                  | 0.0  |
| Minerals                   | 4.2  |

| <b>Fatty acids [%]</b> |       |
|------------------------|-------|
| Saturated              | 23.31 |
| Unsaturated            | 9.4   |
| Monounsaturated        | 7.1   |
| Polyunsaturated        | 2.7   |

**HFD150 (“added fiber”)  
SAFE (modified HFD260)**

Source: butter-based

**Metabolizable Energy (Atwater) 22.2 MJ/kg**

|           |     |
|-----------|-----|
| Cellulose | 1.4 |
|-----------|-----|

**Energy-reduced food  
ssniff (V9631-S710)**

**Gross Energy (GE) 14.6 MJ/kg**  
**Metabolizable Energy (ME) 7.7 MJ/kg**

| <b>Calories</b> | <b>[%]</b> |
|-----------------|------------|
| Carbohydrates   | 11.0       |
| Protein         | 51.0       |
| Fat             | 11.0       |

| <b>Crude Nutrients [%]</b> |      |
|----------------------------|------|
| Crude protein (N x 6.25)   | 17.5 |
| Crude fat                  | 2.6  |
| Crude fibre                | 17.3 |
| NDF                        | 31.2 |
| ADF                        | 17.7 |
| Crude ash                  | 7.5  |
| Starch                     | 9.5  |
| Sugar                      | 4.8  |
| N free extracts            | 36.4 |

The energy density of this special diet has been reduced by 30 – 40 % when compared with a conventional maintenance or a breeding diet, respectively.

**CHOW ssniff  
(ssniff, Germany)  
V1554-703**

Source: vegetal diet, no soybean, alfalfa, low phytoestrogens

**Gross Energy** 14.74 MJ/kg  
**Metabolizable Energy** 13.75 MJ/kg

**Calories** [%]  
Carbohydrates 67.0  
Protein 23.0  
Fat 10.0

**Crude Nutrients** [% weight]  
Crude protein (N x 6.25) 19.1  
Crude fat 3.4  
Crude fibre 4.6  
NDF 20.6  
ADF 6.5  
Crude ash 6.0  
Starch 34.5  
Sugar 3.3  
N free extracts 55.1

**Dietary composition:**

Wheat, barley, corn gluten, potato proteins, minerals, oat hulls, vitamins and trace elements vegetable oil, L-lysine HCl, DL-methionine

**CHOW SAFE  
(SAFE Diets, France)  
SAFE-150**

Source: vegetal diet, no soybean, alfalfa, low phytoestrogens

**Gross Energy** 16.4 MJ/kg  
**Metabolizable Energy** 13.7 MJ/kg

**Calories**  
Carbohydrates 66.4  
Protein 21.0  
Fat 12.6

**Crude Nutrients** [% weight]  
Nitrogen Free Extract 56.9 %  
of which Starch 41.0 %  
of which Sugars 3.4 %  
Crude Protein 18.0 %  
Crude Fat 4.8 %  
Crude Ash 4.2 %  
Crude Fiber 4.1 %  
Moisture 12.0 %

**Dietary composition:**

Barley, wheat, maize, maize gluten, wheat germ, wheat bran, potato protein, sunflower seed, inactivated brewer's yeast, calcium carbonate, pre-mixture of vitamins, pre-mixture of minerals, dicalcium phosphate, L-lysine, DL-methionine

**Chow SDS  
(Special Diet Services)  
Rat and Mouse No.3 Breeding (RM3)  
RM3 (E) SQC (811181)**

Source: soya, fish-meal, wheat (see below)

**Gross Energy** 15.21 MJ/kg  
**Metabolizable Energy** 13.9 MJ/kg

**Calories** [%]  
Carbohydrates 61.57  
Proteins 26.93  
Fat 11.5

**Crude Nutrients** [% weight]  
Glucides 51.59  
Proteins 22.39  
Fibers 4.21  
Ash minerals 7.56  
Lipids 4.25  
Humidity 10

**Dietary composition:**

Wheat, Wheatfeed, De-hulled Extracted Toasted Soya, Barley, Fish Meal, Whey Powder, Macro Minerals, Yeast, Soya Oil, Vitamins, Micro Minerals, Amino Acids.

**Supplementary Table 3: Enrichment of GO processes in RNA sequencing data from Ppara I-KO vs. Ppara lox/lox mice on HFD diet, from duodenum tissue.**

| Enrichment analysis report |                                                                         |       |           |           |
|----------------------------|-------------------------------------------------------------------------|-------|-----------|-----------|
| Enrichment by GO Processes |                                                                         |       |           |           |
| #                          | Processes                                                               | Total | pValue    | Min FDR   |
| 1                          | <a href="#">lipid metabolic process</a>                                 | 1643  | 4.768E-22 | 3.068E-18 |
| 2                          | <a href="#">cellular lipid metabolic process</a>                        | 1277  | 1.578E-21 | 5.077E-18 |
| 3                          | <a href="#">monocarboxylic acid metabolic process</a>                   | 717   | 2.778E-21 | 5.959E-18 |
| 4                          | <a href="#">cellular lipid catabolic process</a>                        | 281   | 4.647E-20 | 7.477E-17 |
| 5                          | <a href="#">lipid catabolic process</a>                                 | 407   | 1.953E-19 | 2.514E-16 |
| 6                          | <a href="#">fatty acid metabolic process</a>                            | 449   | 8.022E-19 | 8.605E-16 |
| 7                          | <a href="#">small molecule metabolic process</a>                        | 2290  | 1.577E-18 | 1.450E-15 |
| 8                          | <a href="#">monocarboxylic acid catabolic process</a>                   | 148   | 3.460E-18 | 2.784E-15 |
| 9                          | <a href="#">fatty acid catabolic process</a>                            | 118   | 3.947E-18 | 2.823E-15 |
| 10                         | <a href="#">carboxylic acid metabolic process</a>                       | 1160  | 6.741E-18 | 4.338E-15 |
| 11                         | <a href="#">response to organic substance</a>                           | 4903  | 2.019E-17 | 1.050E-14 |
| 12                         | <a href="#">carboxylic acid catabolic process</a>                       | 320   | 2.122E-17 | 1.050E-14 |
| 13                         | <a href="#">organic acid catabolic process</a>                          | 320   | 2.122E-17 | 1.050E-14 |
| 14                         | <a href="#">organic acid metabolic process</a>                          | 1306  | 2.998E-17 | 1.378E-14 |
| 15                         | <a href="#">oxoacid metabolic process</a>                               | 1273  | 3.442E-17 | 1.477E-14 |
| 16                         | <a href="#">response to drug</a>                                        | 2022  | 4.144E-16 | 1.667E-13 |
| 17                         | <a href="#">regulation of lipid metabolic process</a>                   | 680   | 1.436E-15 | 5.437E-13 |
| 18                         | <a href="#">lipid oxidation</a>                                         | 106   | 1.689E-15 | 6.038E-13 |
| 19                         | <a href="#">small molecule catabolic process</a>                        | 541   | 2.573E-15 | 8.716E-13 |
| 20                         | <a href="#">fatty acid beta-oxidation</a>                               | 68    | 3.101E-15 | 9.980E-13 |
| 21                         | <a href="#">fatty acid oxidation</a>                                    | 100   | 8.740E-15 | 2.679E-12 |
| 22                         | <a href="#">response to oxygen-containing compound</a>                  | 2993  | 1.949E-14 | 5.701E-12 |
| 23                         | <a href="#">cellular response to chemical stimulus</a>                  | 4593  | 3.854E-14 | 1.078E-11 |
| 24                         | <a href="#">oxidation-reduction process</a>                             | 1285  | 4.074E-14 | 1.092E-11 |
| 25                         | <a href="#">vascular process in circulatory system</a>                  | 351   | 1.027E-13 | 2.643E-11 |
| 26                         | <a href="#">response to organic cyclic compound</a>                     | 1979  | 1.217E-13 | 3.014E-11 |
| 27                         | <a href="#">regulation of biological quality</a>                        | 5819  | 1.276E-13 | 3.042E-11 |
| 28                         | <a href="#">cellular response to toxic substance</a>                    | 385   | 1.759E-13 | 4.043E-11 |
| 29                         | <a href="#">response to lipid</a>                                       | 1847  | 3.430E-13 | 7.612E-11 |
| 30                         | <a href="#">response to chemical</a>                                    | 7112  | 3.721E-13 | 7.984E-11 |
| 31                         | <a href="#">negative regulation of multicellular organismal process</a> | 1914  | 6.279E-13 | 1.304E-10 |
| 32                         | <a href="#">regulation of anatomical structure size</a>                 | 841   | 2.056E-12 | 4.135E-10 |
| 33                         | <a href="#">response to hormone</a>                                     | 1876  | 6.116E-12 | 1.193E-09 |
| 34                         | <a href="#">response to toxic substance</a>                             | 1058  | 6.941E-12 | 1.314E-09 |
| 35                         | <a href="#">metabolic process</a>                                       | 10952 | 1.246E-11 | 2.292E-09 |
| 36                         | <a href="#">response to endogenous stimulus</a>                         | 2742  | 1.308E-11 | 2.338E-09 |
| 37                         | <a href="#">regulation of tube size</a>                                 | 290   | 1.408E-11 | 2.449E-09 |
| 38                         | <a href="#">regulation of locomotion</a>                                | 1448  | 1.786E-11 | 3.025E-09 |
| 39                         | <a href="#">regulation of cell migration</a>                            | 1293  | 2.293E-11 | 3.784E-09 |



|    |                                                                 |      |           |           |
|----|-----------------------------------------------------------------|------|-----------|-----------|
| 40 | <a href="#">regulation of localization</a>                      | 4092 | 2.356E-11 | 3.790E-09 |
| 41 | <a href="#">cellular response to oxygen-containing compound</a> | 2030 | 2.731E-11 | 4.288E-09 |
| 42 | <a href="#">substantia nigra development</a>                    | 86   | 3.576E-11 | 5.480E-09 |
| 43 | <a href="#">response to acid chemical</a>                       | 883  | 3.750E-11 | 5.612E-09 |
| 44 | <a href="#">rhythmic process</a>                                | 546  | 5.345E-11 | 7.818E-09 |
| 45 | <a href="#">cellular metabolic process</a>                      | 9840 | 5.706E-11 | 8.160E-09 |
| 46 | <a href="#">cellular response to organic substance</a>          | 3784 | 5.946E-11 | 8.319E-09 |
| 47 | <a href="#">regulation of cell motility</a>                     | 1377 | 7.556E-11 | 1.000E-08 |
| 48 | <a href="#">regulation of blood vessel diameter</a>             | 288  | 7.752E-11 | 1.000E-08 |
| 49 | <a href="#">regulation of tube diameter</a>                     | 288  | 7.752E-11 | 1.000E-08 |
| 50 | <a href="#">regulation of cellular component movement</a>       | 1504 | 7.770E-11 | 1.000E-08 |
| 51 | <a href="#">long-chain fatty acid transport</a>                 | 92   | 9.158E-11 | 1.154E-08 |
| 52 | <a href="#">postsynapse organization</a>                        | 192  | 9.326E-11 | 1.154E-08 |
| 53 | <a href="#">response to antibiotic</a>                          | 742  | 1.612E-10 | 1.957E-08 |

|    |                                                                    |       |           |           |
|----|--------------------------------------------------------------------|-------|-----------|-----------|
| 54 | <a href="#">positive regulation of cell migration</a>              | 817   | 1.785E-10 | 2.127E-08 |
| 55 | <a href="#">cellular response to antibiotic</a>                    | 280   | 2.754E-10 | 3.223E-08 |
| 56 | <a href="#">circulatory system process</a>                         | 722   | 2.901E-10 | 3.334E-08 |
| 57 | <a href="#">terpenoid metabolic process</a>                        | 182   | 2.957E-10 | 3.339E-08 |
| 58 | <a href="#">regulation of wound healing</a>                        | 256   | 3.207E-10 | 3.559E-08 |
| 59 | <a href="#">response to organonitrogen compound</a>                | 1982  | 4.882E-10 | 5.326E-08 |
| 60 | <a href="#">neural nucleus development</a>                         | 124   | 5.465E-10 | 5.862E-08 |
| 61 | <a href="#">regulation of hormone levels</a>                       | 929   | 6.172E-10 | 6.507E-08 |
| 62 | <a href="#">cellular catabolic process</a>                         | 2370  | 6.301E-10 | 6.507E-08 |
| 63 | <a href="#">positive regulation of cell motility</a>               | 854   | 6.370E-10 | 6.507E-08 |
| 64 | <a href="#">regulation of fatty acid metabolic process</a>         | 168   | 6.498E-10 | 6.535E-08 |
| 65 | <a href="#">diterpenoid metabolic process</a>                      | 170   | 7.814E-10 | 7.737E-08 |
| 66 | <a href="#">regulation of system process</a>                       | 1018  | 8.695E-10 | 8.479E-08 |
| 67 | <a href="#">cellular response to drug</a>                          | 791   | 9.424E-10 | 9.053E-08 |
| 68 | <a href="#">lipid modification</a>                                 | 275   | 1.184E-09 | 1.121E-07 |
| 69 | <a href="#">response to steroid hormone</a>                        | 765   | 1.374E-09 | 1.254E-07 |
| 70 | <a href="#">central nervous system development</a>                 | 1713  | 1.377E-09 | 1.254E-07 |
| 71 | <a href="#">regulation of response to wounding</a>                 | 305   | 1.384E-09 | 1.254E-07 |
| 72 | <a href="#">organic substance metabolic process</a>                | 10219 | 1.422E-09 | 1.269E-07 |
| 73 | <a href="#">positive regulation of locomotion</a>                  | 879   | 1.440E-09 | 1.269E-07 |
| 74 | <a href="#">fatty acid transport</a>                               | 113   | 1.503E-09 | 1.307E-07 |
| 75 | <a href="#">regulation of focal adhesion assembly</a>              | 95    | 1.676E-09 | 1.420E-07 |
| 76 | <a href="#">regulation of cell-substrate junction assembly</a>     | 95    | 1.676E-09 | 1.420E-07 |
| 77 | <a href="#">catabolic process</a>                                  | 2718  | 1.705E-09 | 1.425E-07 |
| 78 | <a href="#">positive regulation of cellular component movement</a> | 890   | 2.040E-09 | 1.663E-07 |
| 79 | <a href="#">isoprenoid metabolic process</a>                       | 205   | 2.041E-09 | 1.663E-07 |
| 80 | <a href="#">system development</a>                                 | 6693  | 2.129E-09 | 1.698E-07 |
| 81 | <a href="#">organic substance catabolic process</a>                | 2292  | 2.137E-09 | 1.698E-07 |
| 82 | <a href="#">multicellular organism development</a>                 | 7553  | 2.521E-09 | 1.979E-07 |

|     |                                                                    |      |           |           |  |
|-----|--------------------------------------------------------------------|------|-----------|-----------|--|
| 83  | <a href="#">positive regulation of blood vessel diameter</a>       | 139  | 2.733E-09 | 2.119E-07 |  |
| 84  | <a href="#">regulation of cell-substrate junction organization</a> | 100  | 3.194E-09 | 2.448E-07 |  |
| 85  | <a href="#">detoxification</a>                                     | 190  | 4.323E-09 | 3.273E-07 |  |
| 86  | <a href="#">enzyme linked receptor protein signaling pathway</a>   | 1034 | 4.374E-09 | 3.274E-07 |  |
| 87  | <a href="#">developmental process</a>                              | 8666 | 4.560E-09 | 3.373E-07 |  |
| 88  | <a href="#">regulation of cell death</a>                           | 2629 | 4.671E-09 | 3.416E-07 |  |
| 89  | <a href="#">blood circulation</a>                                  | 699  | 6.411E-09 | 4.636E-07 |  |
| 90  | <a href="#">response to nitrogen compound</a>                      | 2114 | 6.568E-09 | 4.697E-07 |  |
| 91  | <a href="#">blood vessel development</a>                           | 813  | 6.776E-09 | 4.792E-07 |  |
| 92  | <a href="#">cell junction organization</a>                         | 817  | 7.692E-09 | 5.381E-07 |  |
| 93  | <a href="#">negative regulation of phosphorylation</a>             | 705  | 7.891E-09 | 5.461E-07 |  |
| 94  | <a href="#">regulation of apoptotic process</a>                    | 2371 | 8.787E-09 | 6.016E-07 |  |
| 95  | <a href="#">response to external stimulus</a>                      | 4027 | 9.345E-09 | 6.331E-07 |  |
| 96  | <a href="#">regulation of vasoconstriction</a>                     | 130  | 9.535E-09 | 6.393E-07 |  |
| 97  | <a href="#">regulation of cellular ketone metabolic process</a>    | 282  | 1.044E-08 | 6.927E-07 |  |
| 98  | <a href="#">cell development</a>                                   | 2582 | 1.114E-08 | 7.269E-07 |  |
| 99  | <a href="#">hormone metabolic process</a>                          | 312  | 1.118E-08 | 7.269E-07 |  |
| 100 | <a href="#">blood vessel morphogenesis</a>                         | 682  | 1.271E-08 | 8.181E-07 |  |
|     |                                                                    |      |           |           |  |
